# Supplementary material
Source: PubMed Central journal article supplement (PMC3683755)
Supplement: 1222606110_pnas.201222606SI.pdf [file 1222606110_pnas.201222606SI.pdf]

# Supporting Information

Tokutsu and Minagawa 10.1073/pnas.1222606110

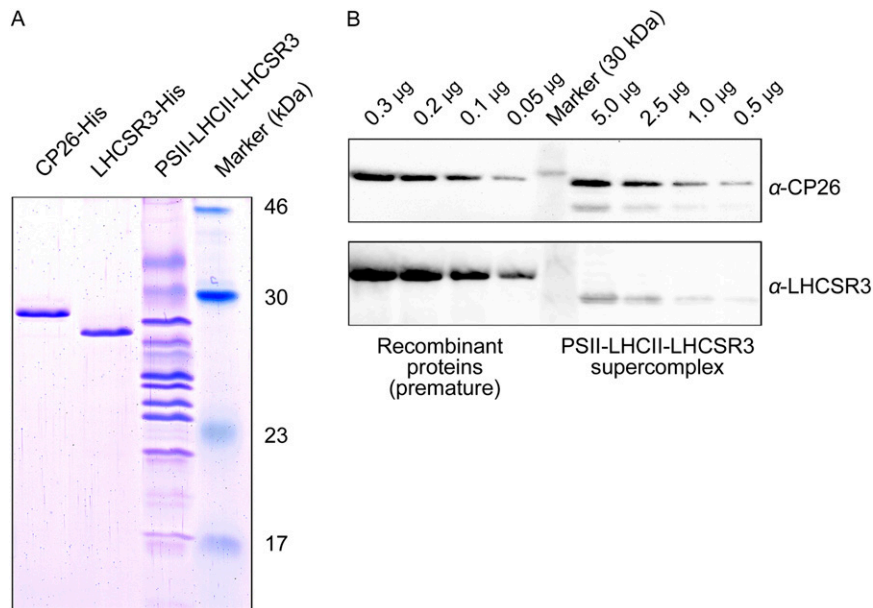

**Fig. 51.** Quantification of the light-harvesting complex stress-related protein 3 (LHCSR3) in the photosystem II (PSII)–light-harvesting complex II (LHCII)–LHCSR3 supercomplex. (A) Recombinant proteins [0.5  $\mu$ g of CP26 (a minor monomeric LHCII protein)–His and LHCSR3–His proteins] purified from the *Escherichia coli* and PSII-LHCII-LHCSR3 supercomplex (5.0  $\mu$ g protein) from the high-light (HL)-grown WT were analyzed by SDS/PAGE and stained with Coomassie brilliant blue R-250. (B) The recombinant proteins (0.05–0.3  $\mu$ g protein) and proteins in the PSII-LHCII-LHCSR3 supercomplex (0.5–5.0  $\mu$ g protein) were detected immunologically with the indicated antibodies.

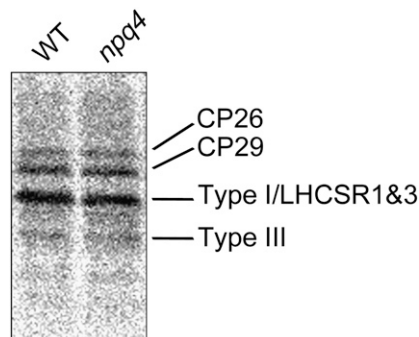

**Fig. 52.** Dicyclohexylcarbodiimide (DCCD) binding to the PSII supercomplexes isolated from the HL-grown cells. The PSII-LHCII-LHCSR3 supercomplex from the HL-grown WT and the PSII-LHCII supercomplex from the HL-grown nonphotochemical quenching 4 (*npq4*) mutant were treated with [ $^{14}$ C]-DCCD under the same conditions as for the DCCD-inhibited energy-dependent quenching (qE) activation. The radiolabeled polypeptides were visualized by autoradiography after separation by SDS/PAGE. Type I, major LHCII type I (LHCBM3/4/6/8/9); type III, major LHCII type III (LHCBM2/7).
